# Supplementary material for: On the use of satellite observations to fill gaps in the Halley station total ozone record
Source: Copernicus journal article supplement (doi:10.5194/acp-21-9829-2021), 2021-06-30
Supplement: Supplementary file 1 [file acp-21-9829-2021-supplement.pdf]

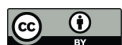

*Supplement of*

## **On the use of satellite observations to fill gaps in the Halley station total ozone record**

**Lily N. Zhang et al.**

*Correspondence to:* Lily N. Zhang (lnz0018@gmail.com)

The copyright of individual parts of the supplement might differ from the article licence.

**Figures: Timeseries of the Satellite Average and Halley Dobson from 1970 to 2014 (see main text for data after 2014).**

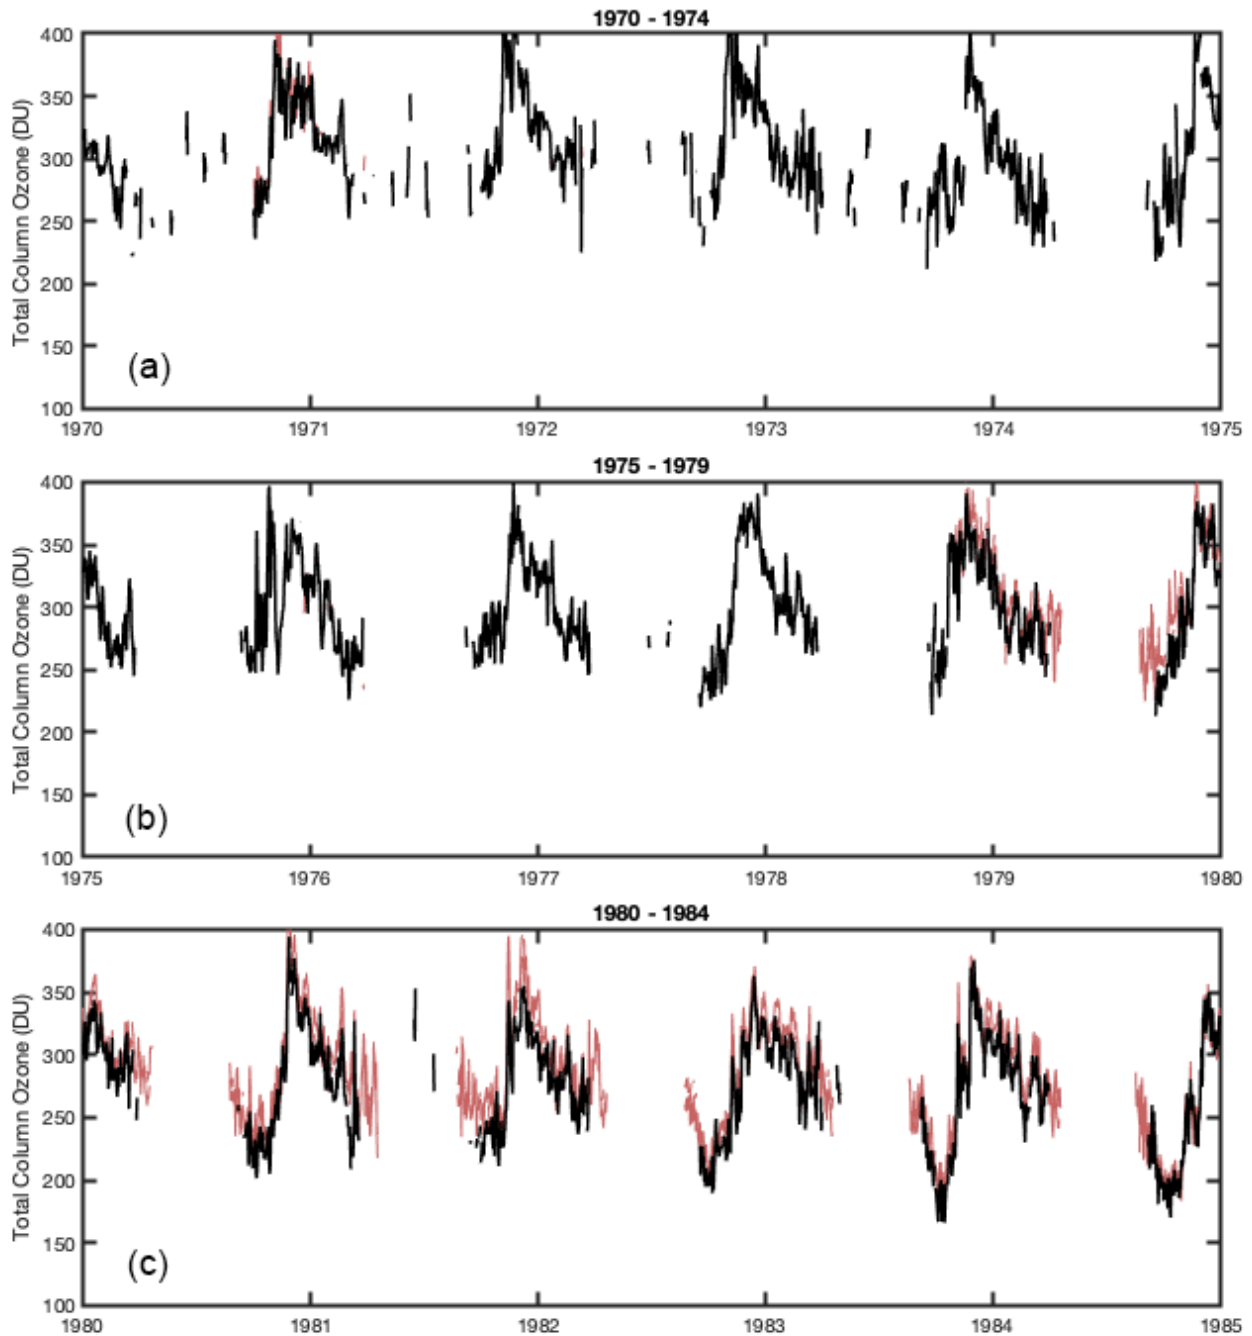

**Figure S1:** Daily averages for total column ozone measurements by Dobson instruments at Halley station (in black) overlaid on top of all available (raw) satellite daily averages (in red) from (a) 1970-1974 (b) 1975-1979 (c) 1980-1984.

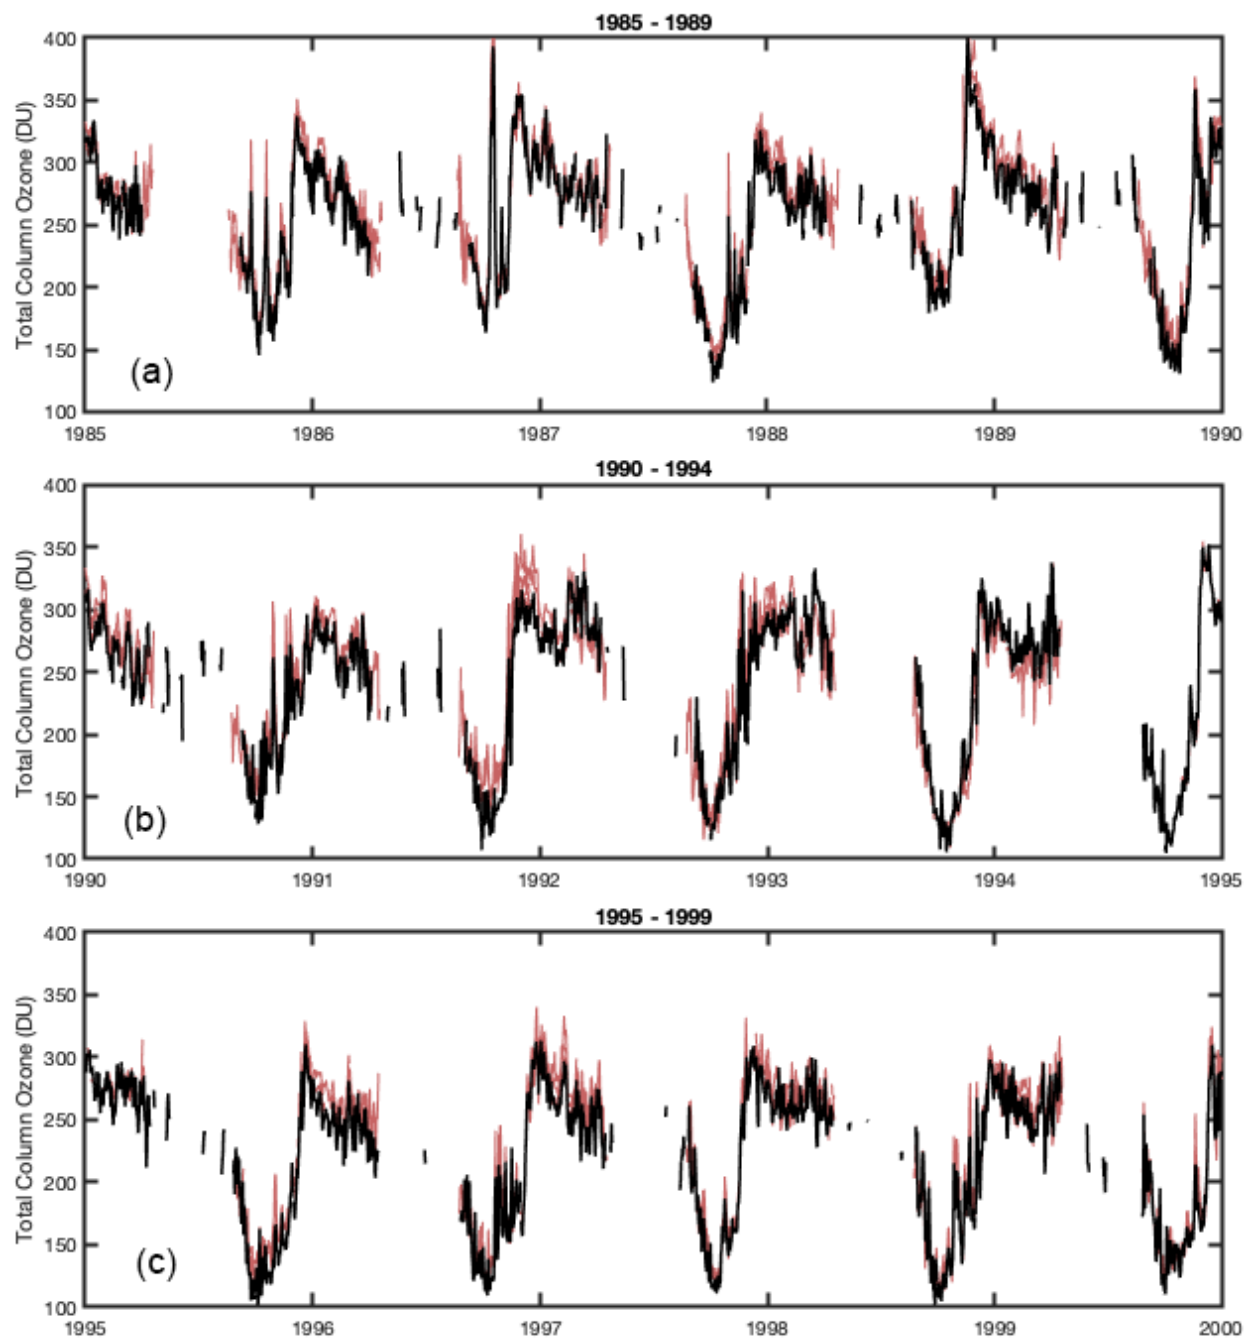

**Figure S2:** Daily averages for total column ozone measurements by Dobson instruments at Halley station (in black) overlaid on top of all available (raw) satellite daily averages (in red) from (a) 1985-1989 (b) 1990-1994 (c) 1995-1999.

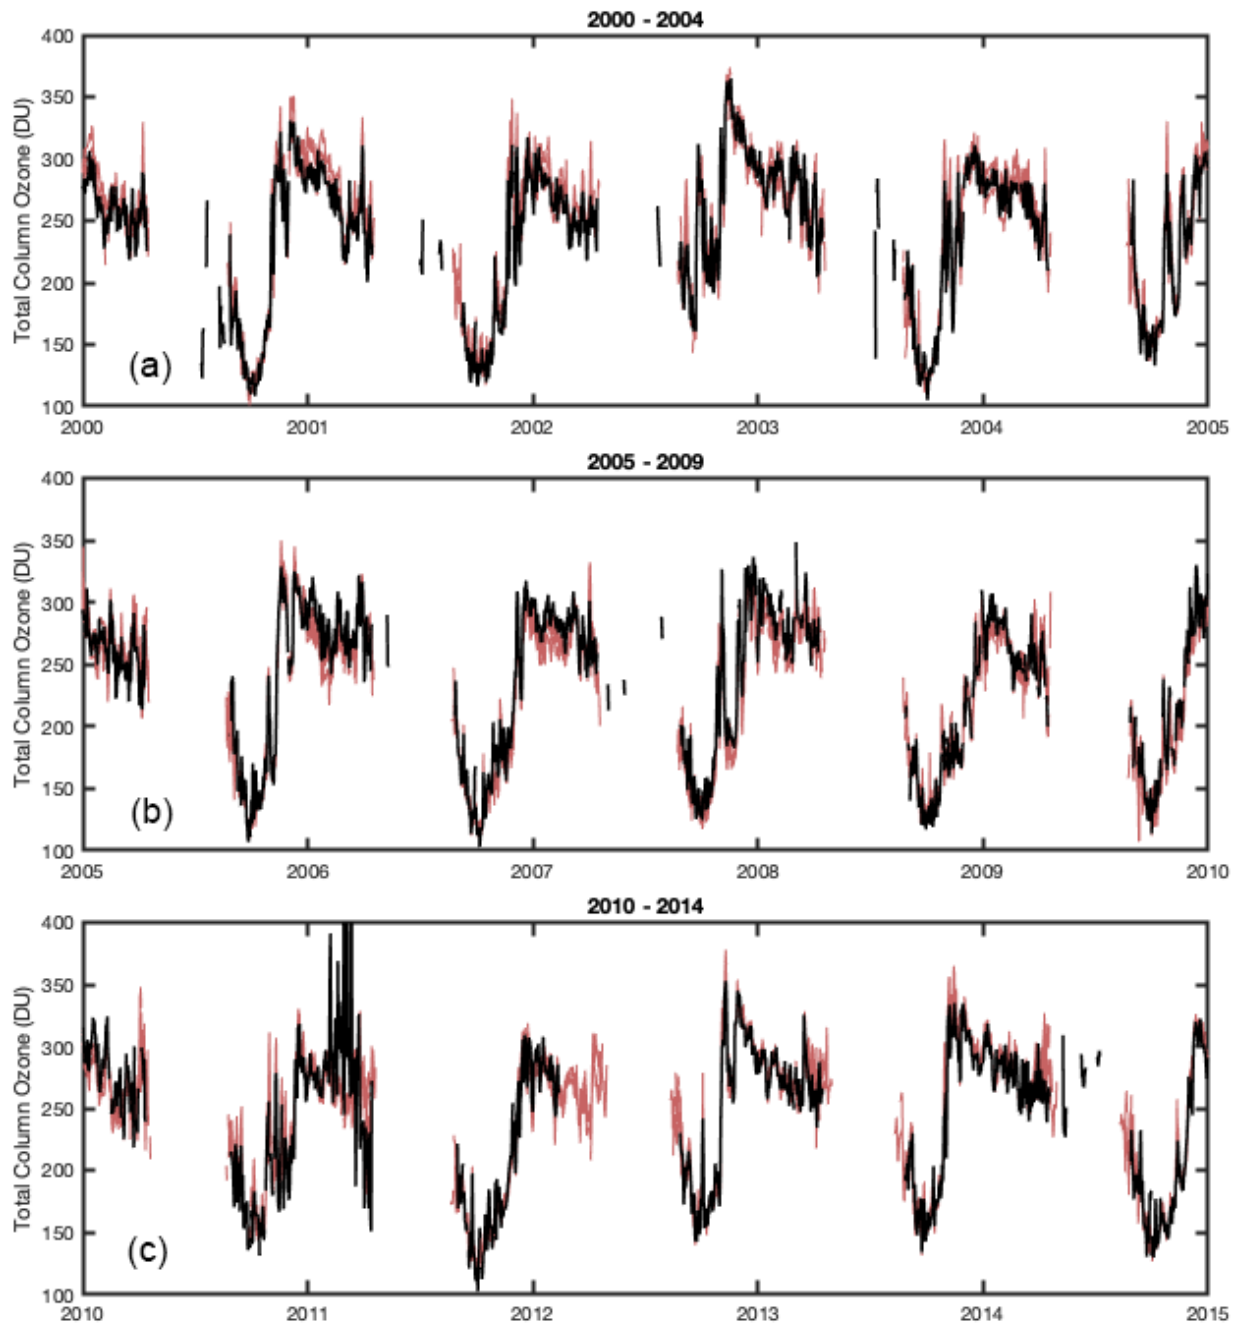

**Figure S3:** Daily averages for total column ozone measurements by Dobson instruments at Halley station (in black) overlaid on top of all available (raw) satellite daily averages (in red) from (a) 2000-2004 (b) 2005-2009 (c) 2010-2014.
